# Supplementary material for: Prevalence of Livestock-Associated MRSA in Communities with High Pig-Densities in The Netherlands
Source: PubMed Central journal article supplement (PMC2828479; doi:10.1371/journal.pone.0009385), 2010-02-25
Supplement: pone.0009385.s001.pdf [file pone.0009385.s001.pdf]

**Supplementary Figure S1.** Questionnaire used in this cross-sectional study

| General |                                                                      |
|---------|----------------------------------------------------------------------|
| 1       | Gender <input type="checkbox"/> male <input type="checkbox"/> female |
| 2       | Date of birth .....-.....-.....                                      |
| 3       | Postal code .....                                                    |
| 4       | Current date .....-.....-.....                                       |

| Living and working |                                                                                                                    |
|--------------------|--------------------------------------------------------------------------------------------------------------------|
| 5a                 | Are you living at a pig farm at the moment? <input type="checkbox"/> yes <input type="checkbox"/> no               |
| b                  | Are you living at a veal calf farm at the moment? <input type="checkbox"/> yes <input type="checkbox"/> no         |
| c                  | Are you living at a poultry farm at the moment? <input type="checkbox"/> yes <input type="checkbox"/> no           |
| 6a                 | Do you work with live pigs (at least once a week)? <input type="checkbox"/> yes <input type="checkbox"/> no        |
| b                  | Do you work with live veal calves (at least once a week)? <input type="checkbox"/> yes <input type="checkbox"/> no |
| c                  | Do you work with live poultry (at least once a week)? <input type="checkbox"/> yes <input type="checkbox"/> no     |
| 7                  | Do you work in healthcare? <input type="checkbox"/> yes <input type="checkbox"/> no                                |
|                    | If so, in which function? .....                                                                                    |

| Health |                                                                                                                                     |
|--------|-------------------------------------------------------------------------------------------------------------------------------------|
| 8      | Have you ever had MRSA previously? <input type="checkbox"/> yes <input type="checkbox"/> no                                         |
|        | If so, are you MRSA negative at the moment? <input type="checkbox"/> yes <input type="checkbox"/> no                                |
|        | If so, since when? .....                                                                                                            |
| 9      | Have you had contact with a MRSA positive person <i>in the last year</i> ? <input type="checkbox"/> yes <input type="checkbox"/> no |
| 10     | Were you admitted to a hospital abroad <i>in the last 6 months</i> ? <input type="checkbox"/> yes <input type="checkbox"/> no       |

**Comments:** .....

.....

**Thank you very much for completing the questionnaire!**
